# Supplementary material for: A novel yttrium stabilized zirconia and ceria composite electrolyte lowering solid oxide fuel cells working temperature to 400 °C
Source: Royal Society of Chemistry journal article supplement (doi:10.1039/d3ra01507f), 2023-01-01
Supplement: d3ra01507f1.pdf [file d3ra01507f1.pdf]

Electronic supplementary information for

A novel yttrium stabilized zirconia and ceria composite electrolyte lowering solid  
oxide fuel cells working temperature to 400 °C

Yu Liu<sup>a</sup>, Liwen Zuo<sup>a</sup>, Yulian Ye<sup>a</sup>, Cong Jiang<sup>a</sup>, Dan Zheng<sup>b</sup>, Chunlei Liu<sup>a\*</sup>, Baoyuan Wang<sup>a,b\*</sup>,  
Xunying Wang<sup>a,b\*</sup>

<sup>a</sup> *School of Microelectronics and Faculty of Physics and Electronic Science, Hubei University, Wuhan 430062,  
China*

<sup>b</sup> *Hubei Yangtze Memory Laboratories, Wuhan 430205, China*

\* *Corresponding Author: wangxunying@hubu.edu.cn (X. Wang), baoyuanw@163.com (B. Wang),  
liuchunlei7788945@163.com (C. Liu)*

The stability of Ce<sup>4+</sup> ion in the electrolyte (7YSZ-3CeO<sub>2</sub>) under fuel cell working atmosphere has been characterized by XPS. As shown in Figure S1, the ratio of Ce<sup>3+</sup>/Ce<sup>4+</sup> in the original electrolyte is about 3:7, while it increased to about 4:6 for the electrolyte which had experienced fuel cell test. This is because Ce<sup>4+</sup> can be reduced to Ce<sup>3+</sup> by H<sub>2</sub>, which will increase the electronic conductivity of the electrolyte<sup>[1]</sup>. Therefore, the electronic conductivity of the SOFC with 7YSZ-3CeO<sub>2</sub> electrolyte which has been treated by H<sub>2</sub> (anode) under 450 °C for 90 min was tested by chronoamperometry method in N<sub>2</sub> atmosphere. As shown in Figure S2, the current decreased sharply at the beginning and then tended to be stable with the increase of time. Although there was no O<sup>2-</sup> source in N<sub>2</sub> atmosphere, there was also some residual air in the electrode. Therefore, the original current included both electron conduction and O<sup>2-</sup> conduction. With the consumption of air, the contribution of O<sup>2-</sup> conduction to the current decreased, and when the residual air was exhausted, the current density only came from electron conduction. The electronic conductivity of the electrodes are much higher than the 7YSZ-3CeO<sub>2</sub> electrolyte, thus the resistance of the electrodes can be ignored. Accordingly, the resistance of the electrolyte layer (R) can be obtained by the applied voltage (1 V) and the stable current of the above i-t curve (1.07 mA), the electronic conductivity of the electrolyte (σ<sub>e</sub>) can be calculated according to the equation (1):

$$\sigma_e = \frac{l}{RA} \quad (1)$$

Where l and A are the thickness of electrolyte layer (0.0623 cm) and area of the fuel cell device (1.33 cm<sup>2</sup>), respectively. The value of calculated σ<sub>e</sub> is 5.01×10<sup>-5</sup> S cm<sup>-1</sup>. For comparison, the conductivity of the electrolyte layer (σ<sub>t</sub>) under SOFC working atmosphere was also calculated according to the EIS fitting results (Table 1 in the manuscript) according to the equation (1). R is the sum of R<sub>0</sub> and R<sub>1</sub> in Table 1, and l is effective area of the fuel cell (0.64 cm<sup>2</sup>). The value of calculated σ<sub>e</sub> is 0.324 S cm<sup>-1</sup>.

The ionic conductivity of the electrolyte layer ( $\sigma_i$ ) can be calculated by  $\sigma_i/\sigma_e$ , which is about  $0.324 \text{ S cm}^{-1}$ . It can be seen that the ratio of  $\sigma_i/\sigma_e$  is over 6000. According to our previous study<sup>[2]</sup>, the effect of electronic leakage of the electrolyte layer on the SOFC performance can be ignored.

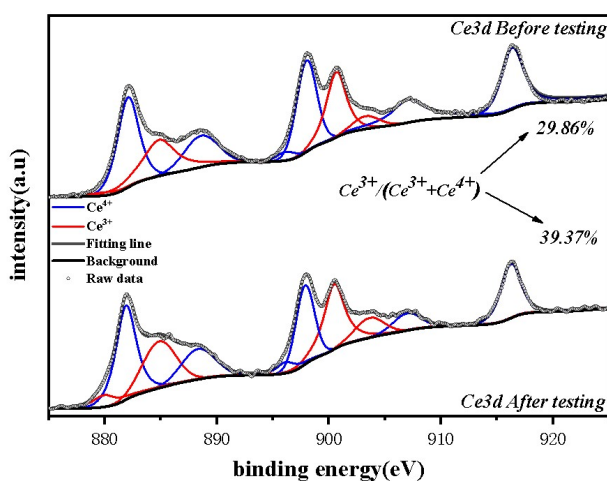

Fig. S1 XPS spectra of the Ce elements in the composite electrolyte before and after fuel cell test.

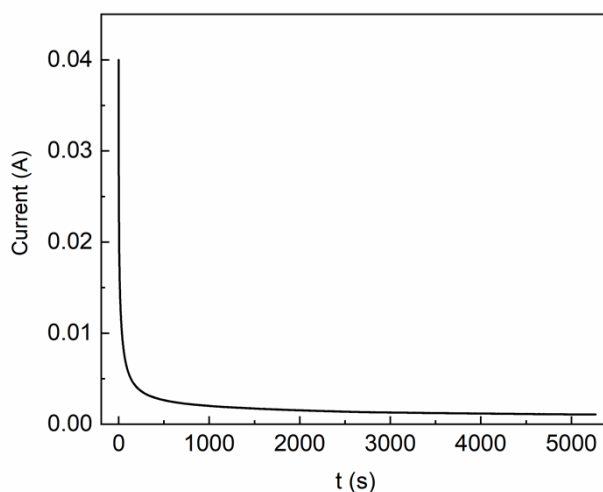

Fig. S2 Chronoamperometry curves (tested in the  $\text{N}_2$  environment under  $450 \text{ }^\circ\text{C}$ ) of the SOFC with 7YSZ-3CeO<sub>2</sub>

electrolyte which has been treated by  $\text{H}_2$  (anode) under  $450 \text{ }^\circ\text{C}$  for 90 min.

## References

[1] P. Vinchi, M. Khandla, K. Chaudhary and R. Pati, *Inorganic Chemistry Communications*, 2023, **152**.

[2] W. Dong, Z. Xiao, M. Hu, R. Ruan, S. Li, X. Wang, C. Xia, B. Wang and H. Wang, *Journal of Power Sources*, 2021, **499**.
